# Supplementary material
Source: HighWire-hosted journal article supplement (https://bjsm.bmj.com/content/bjsports-2016-096422)
Supplement: inline-supplementary-material-4 [file inline-supplementary-material-4.pdf]

Appendix 6 Table 4. Matrix of the treatment effect estimates of all comparisons according to indirect comparison meta-analysis; during cancer treatment, without studies with less than 25 patients per arm on average.

|                       | Aerobic              | CBT_PsychoSocial    | Combined             | CombinedCBT         | Control             | Dance              | HealingTouch_Polarity | Massage              | Relaxation          | Resistance          | TaiChi              | Yoga                 |
|-----------------------|----------------------|---------------------|----------------------|---------------------|---------------------|--------------------|-----------------------|----------------------|---------------------|---------------------|---------------------|----------------------|
| Aerobic               | Aerobic              | 0.21 (-0.38, 0.79)  | -0.3 (-0.86, 0.26)   | 0.14 (-0.73, 1)     | 0.41 (0.06, 0.77)   | 0.55 (-1.16, 2.26) | -0.57 (-2.21, 1.06)   | -0.82 (-2.08, 0.42)  | -0.26 (-0.92, 0.4)  | -0.11 (-0.82, 0.61) | 0.26 (-0.99, 1.51)  | -0.3 (-1.02, 0.42)   |
| CBT_PsychoSocial      | -0.21 (-0.79, 0.38)  | CBT_PsychoSocial    | -0.51 (-1.15, 0.13)  | -0.07 (-1, 0.86)    | 0.21 (-0.26, 0.67)  | 0.35 (-1.39, 2.09) | -0.78 (-2.44, 0.89)   | -1.03 (-2.32, 0.25)  | -0.47 (-1.18, 0.24) | -0.31 (-1.14, 0.51) | 0.05 (-1.23, 1.34)  | -0.5 (-1.29, 0.27)   |
| Combined              | 0.3 (-0.26, 0.86)    | 0.51 (-0.13, 1.15)  | Combined             | 0.44 (-0.49, 1.37)  | 0.72 (0.27, 1.16)   | 0.85 (-0.87, 2.59) | -0.27 (-1.93, 1.39)   | -0.52 (-1.8, 0.75)   | 0.04 (-0.66, 0.74)  | 0.2 (-0.62, 1.01)   | 0.56 (-0.71, 1.84)  | 0 (-0.73, 0.74)      |
| CombinedCBT           | -0.14 (-1, 0.73)     | 0.07 (-0.86, 1)     | -0.44 (-1.37, 0.49)  | CombinedCBT         | 0.28 (-0.54, 1.09)  | 0.42 (-1.44, 2.28) | -0.71 (-2.5, 1.08)    | -0.96 (-2.41, 0.48)  | -0.4 (-1.39, 0.6)   | -0.24 (-1.3, 0.81)  | 0.12 (-1.32, 1.56)  | -0.43 (-1.47, 0.59)  |
| Control               | -0.41 (-0.77, -0.06) | -0.21 (-0.67, 0.26) | -0.72 (-1.16, -0.27) | -0.28 (-1.09, 0.54) | Control             | 0.14 (-1.53, 1.82) | -0.98 (-2.58, 0.61)   | -1.24 (-2.44, -0.05) | -0.67 (-1.25, -0.1) | -0.52 (-1.21, 0.17) | -0.15 (-1.35, 1.04) | -0.71 (-1.35, -0.08) |
| Dance                 | -0.55 (-2.26, 1.16)  | -0.35 (-2.09, 1.39) | -0.85 (-2.59, 0.87)  | -0.42 (-2.28, 1.44) | -0.14 (-1.82, 1.53) | Dance              | -1.12 (-3.44, 1.19)   | -1.37 (-3.44, 0.66)  | -0.81 (-2.59, 0.94) | -0.66 (-2.47, 1.15) | -0.29 (-2.35, 1.75) | -0.85 (-2.64, 0.93)  |
| HealingTouch_Polarity | 0.57 (-1.06, 2.21)   | 0.78 (-0.89, 2.44)  | 0.27 (-1.39, 1.93)   | 0.71 (-1.08, 2.5)   | 0.98 (-0.61, 2.58)  | 1.12 (-1.19, 3.44) | HealingTouch_Polarity | -0.25 (-1.85, 1.33)  | 0.31 (-1.39, 2.01)  | 0.47 (-1.27, 2.2)   | 0.83 (-1.15, 2.83)  | 0.27 (-1.44, 1.98)   |
| Massage               | 0.82 (-0.42, 2.08)   | 1.03 (-0.25, 2.32)  | 0.52 (-0.75, 1.8)    | 0.96 (-0.48, 2.41)  | 1.24 (0.05, 2.44)   | 1.37 (-0.66, 3.44) | 0.25 (-1.33, 1.85)    | Massage              | 0.56 (-0.76, 1.89)  | 0.72 (-0.66, 2.1)   | 1.09 (-0.6, 2.78)   | 0.52 (-0.81, 1.87)   |
| Relaxation            | 0.26 (-0.4, 0.92)    | 0.47 (-0.24, 1.18)  | -0.04 (-0.74, 0.66)  | 0.4 (-0.6, 1.39)    | 0.67 (0.1, 1.25)    | 0.81 (-0.94, 2.59) | -0.31 (-2.01, 1.39)   | -0.56 (-1.89, 0.76)  | Relaxation          | 0.15 (-0.62, 0.93)  | 0.52 (-0.81, 1.85)  | -0.04 (-0.85, 0.78)  |
| Resistance            | 0.11 (-0.61, 0.82)   | 0.31 (-0.51, 1.14)  | -0.2 (-1.01, 0.62)   | 0.24 (-0.81, 1.3)   | 0.52 (-0.17, 1.21)  | 0.66 (-1.15, 2.47) | -0.47 (-2.2, 1.27)    | -0.72 (-2.1, 0.66)   | -0.15 (-0.93, 0.62) | Resistance          | 0.37 (-1.01, 1.75)  | -0.19 (-1.12, 0.73)  |
| TaiChi                | -0.26 (-1.51, 0.99)  | -0.05 (-1.34, 1.23) | -0.56 (-1.84, 0.71)  | -0.12 (-1.56, 1.32) | 0.15 (-1.04, 1.35)  | 0.29 (-1.75, 2.35) | -0.83 (-2.83, 1.15)   | -1.09 (-2.78, 0.6)   | -0.52 (-1.85, 0.81) | -0.37 (-1.75, 1.01) | TaiChi              | -0.56 (-1.91, 0.79)  |
| Yoga                  | 0.3 (-0.42, 1.02)    | 0.5 (-0.27, 1.29)   | 0 (-0.74, 0.73)      | 0.43 (-0.59, 1.47)  | 0.71 (0.08, 1.35)   | 0.85 (-0.93, 2.64) | -0.27 (-1.98, 1.44)   | -0.52 (-1.87, 0.81)  | 0.04 (-0.78, 0.85)  | 0.19 (-0.73, 1.12)  | 0.56 (-0.79, 1.91)  | Yoga                 |

Aerobic = endurance training; CBT\_PsychoSocial = cognitive behavioural treatments or psychosocial interventions; Combined = combined endurance and resistance training; Control = usual care or waiting list; HealingTouch\_Polarity = Treatments were touch was the intervention (not including massage); Relaxation = different interventions with the aim to relax, including meditation; Resistance = resistance training.

A negative value indicates a better effect for the treatment written above.
